# Supplementary material for: Highly efficient syntheses of [methyl-11C]thymidine and its analogue 4′-[methyl-11C]thiothymidine as nucleoside PET probes for cancer cell proliferation by Pd0-mediated rapid C-[11C]methylation
Source: Royal Society of Chemistry journal article supplement (doi:10.1039/c0ob01249a), 2011-01-01

## Supporting Information

**Highly efficient syntheses of [methyl-<sup>11</sup>C]thymidine and its analogue 4'-[methyl-<sup>11</sup>C]thiothymidine as nucleoside PET probes for cancer cell proliferation by Pd<sup>0</sup>-mediated rapid C-[<sup>11</sup>C]methylation**

**Hiroko Koyama,<sup>a</sup> Siqin,<sup>b</sup> Zhouen Zhang,<sup>b</sup> Kengo Sumi,<sup>a</sup> Yuma Hatta,<sup>a</sup> Hiroko Nagata,<sup>b</sup> Hisashi Doi<sup>b</sup> and Masaaki Suzuki<sup>\*b</sup>**

*<sup>a</sup>Division of Regeneration and Advanced Medical Science, Gifu University*

*Graduate School of Medicine, Yanagido 1-1, Gifu 501-1193, Japan*

*<sup>b</sup>RIKEN Center for Molecular Imaging Science (CMIS), Minatojima-minamimachi 6-7-3, Chuo-ku, Kobe 650-0047, Japan.*

*E-mail: suzuki.masaaki@riken.jp*

1. General Information
2. a) HPLC chart for co-injection of **1** (retention time: 10.5 min), b) HPLC chart for co-injection of **4** (retention time: 12.0 min), c) HPLC chart for co-injection of [<sup>11</sup>C]**1** (retention time: 6.8 min), d) HPLC chart for co-injection of [<sup>11</sup>C]**4** (retention time: 7.4 min).

3. a) HPLC chart after the rapid [ $^{11}\text{C}$ ]C-methylation of [ $^{11}\text{C}$ ]CH<sub>3</sub>I and **6**, giving [ $^{11}\text{C}$ ]**1** (retention time: 12.5 min), and b) HPLC chart after purification of [ $^{11}\text{C}$ ]**1**
4. a) HPLC chart after the rapid [ $^{11}\text{C}$ ]C-methylation of [ $^{11}\text{C}$ ]CH<sub>3</sub>I and **5**, giving [ $^{11}\text{C}$ ]**4** (retention time: 12.5 min), and b) HPLC chart after purification of [ $^{11}\text{C}$ ]**4**

## 1. General information

Instrument: Shimadzu HPLC system with a system controller (SCL-10AVP), a degasser (DGU-12A), a liquid chromatograph (LC-10AT and LC-10ATVP), a column oven (CTO-10AVP), an UV-vis detector (SPD-10A), and software (CLASS-VP); column, SHIM-PACK CLC-ODS (6.0 mm I.D. × 250 mm, SHIMADZU); mobil phase, CH<sub>3</sub>CN:100 mM NaH<sub>2</sub>PO<sub>4</sub> containing 200 mM NaClO<sub>4</sub> (pH 2) (6:94, v/v); flow rate, 1.0 mL min<sup>-1</sup>; detection, UV 260 nm; column temperature, 40 °C; retention time, thymidine (**1**), 10.7 min.

Instrument: JASCO HPLC system with a chromatography interface (LC-Net II/ADC), a quaternary HPLC pump (PU-2089Plus), a diode array detector (MD-2010Plus), a column oven (CO-2065Plus), a recycling valve unit (RV-2080-02), and software (chrom NAV chromatography data system); column, SHIM-PACK CLC-ODS (6.0 mm I.D. × 150 mm, SHIMADZU); mobil phase, CH<sub>3</sub>CN:100 mM NaH<sub>2</sub>PO<sub>4</sub> containing 200 mM NaClO<sub>4</sub> (pH 2) (6:94, v/v); flow rate, 1.0 mL min<sup>-1</sup>; detection, UV 260 nm; column temperature, 40 °C; retention time, 4'-thiothymidine (**4**), 12.0 min; 2'-deoxy-4'-thiouridine (**8**), 6.8 min.

Shimadzu HPLC system with a system controller (CBM-20A), an online degasser (DHU-20A<sub>3</sub>), a solvent delivery unit (LC-20AD), a column oven (CTO-20AC), a photodiode array detector (SPD-20A), and software (LC solution) and an Aloka radioanalyzer (RLC-700).

Preparative HPLC conditions: semi-preparative column, Gemini 5 C18 (21.2 mm I.D. × 250 mm, Phenomenex); mobile phase, CH<sub>3</sub>CN:100 mM NH<sub>4</sub>HCO<sub>3</sub> (pH 7.8) (4:96, v/v); flow rate, 9.9 mL min<sup>-1</sup>; detection, UV 265 nm; retention time of [methyl-<sup>11</sup>C]thymidine, 12.5 min; mobile phase, CH<sub>3</sub>CN:100 mM NH<sub>4</sub>HCO<sub>3</sub> (pH 7.8) (7:93, v/v); flow rate, 9.9 mL min<sup>-1</sup>; detection, UV 270 nm; retention time of 4'-[methyl-<sup>11</sup>C]thiothymidine, 12.5 min.

Analytical HPLC conditions for determination of purity: column, Luna 5 C18 (4.6 mm I.D. × 150 mm, Phenomenex); mobile phase, CH<sub>3</sub>CN:100 mM NH<sub>4</sub>HCO<sub>3</sub> (pH 7.8) (4:97, v/v); flow rate, 1.0 mL min<sup>-1</sup>; detection, UV 265 nm; retention time of [methyl-<sup>11</sup>C]thymidine, 6.9 min; mobile phase, CH<sub>3</sub>CN:100 mM NH<sub>4</sub>HCO<sub>3</sub> (pH 7.8) (8:93, v/v); flow rate, 1.0 mL min<sup>-1</sup>; detection, UV 270 nm; retention time of 4'-[methyl-<sup>11</sup>C]thiothymidine, 7.5 min.

2. a) HPLC chart for co-injection of **1** (retention time: 10.5 min)

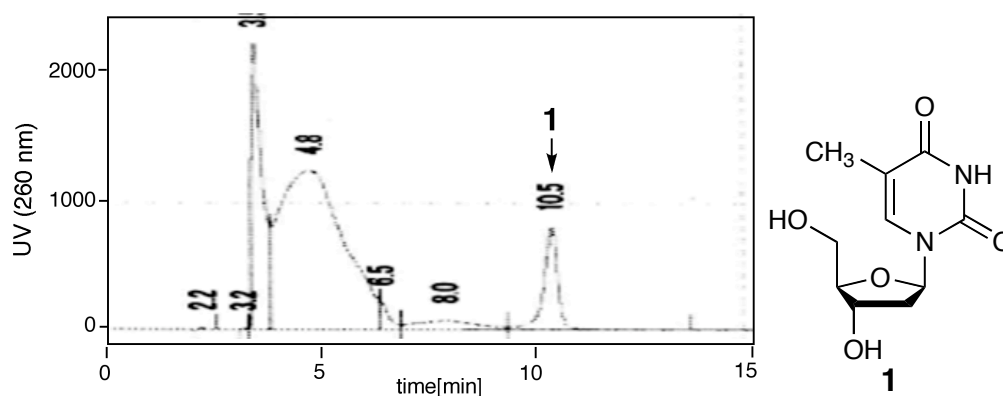

b) HPLC chart for co-injection of **4** (retention time: 12.0 min)

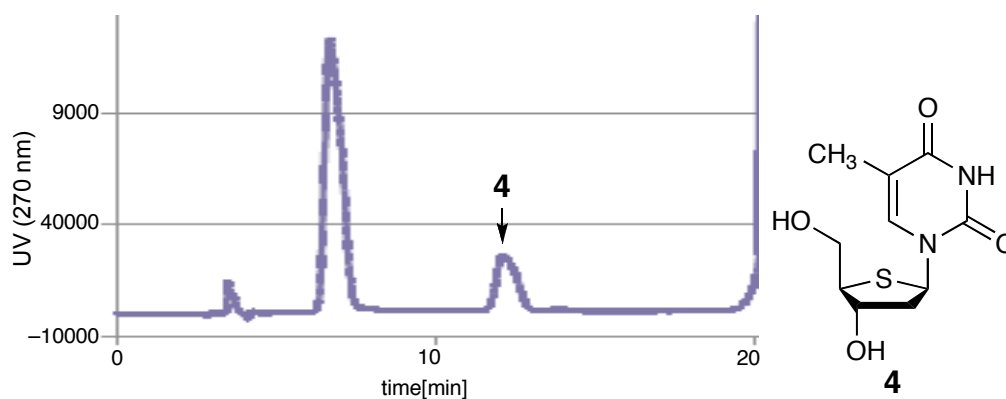

c) HPLC chart for co-injection of [ $^{11}\text{C}$ ]**1** (retention time: 6.8 min)

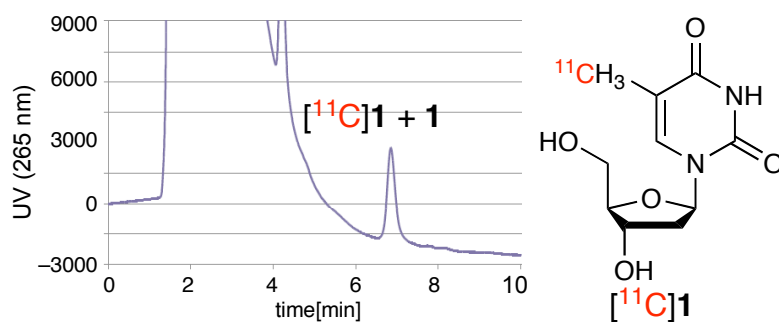

d) HPLC chart for co-injection of [ $^{11}\text{C}$ ]**4** (retention time: 7.4 min)

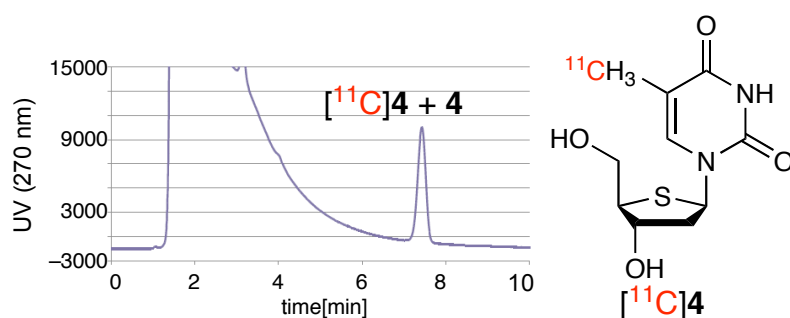

3. a) HPLC chart after the rapid [ $^{11}\text{C}$ ]C-methylation of [ $^{11}\text{C}$ ]CH<sub>3</sub>I and **6**, giving [ $^{11}\text{C}$ ]**1** (retention time: 12.5 min), and b) HPLC chart after purification of [ $^{11}\text{C}$ ]**1**.

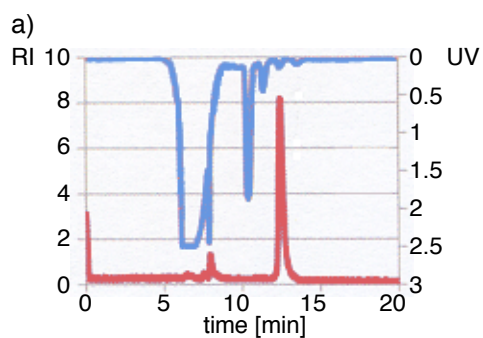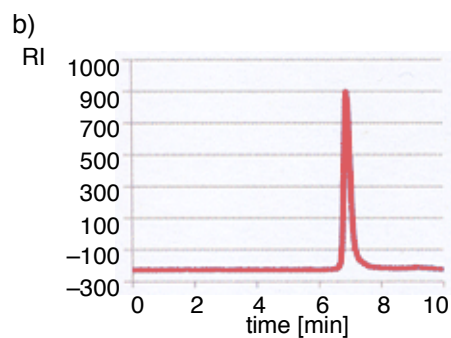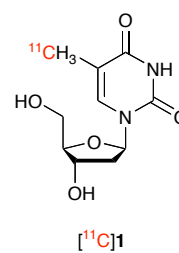

3. a) HPLC chart after the rapid [<sup>11</sup>C]C-methylation of [<sup>11</sup>C]CH<sub>3</sub>I and **5**, giving [<sup>11</sup>C]**4** (retention time: 12.5 min), and b) HPLC chart after purification of [<sup>11</sup>C]**4**

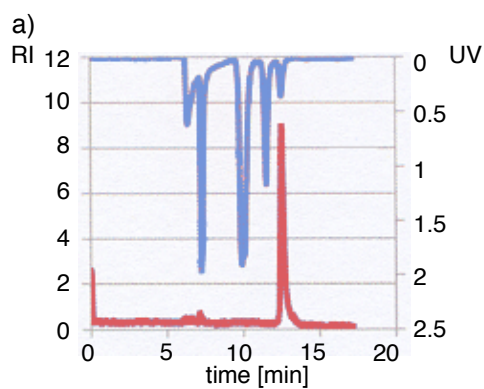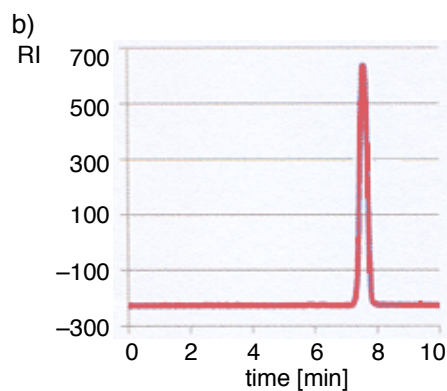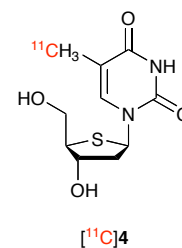

Supplement: c0ob01249a.pdf [file c0ob01249a.pdf]
